# Supplementary material
Source: PubMed Central journal article supplement (PMC7747459)
Supplement: 40820_2017_133_MOESM1_ESM.pdf [file 40820_2017_133_MOESM1_ESM.pdf]

## Supporting Information for

# Dye-enhanced Self-Electrophoretic Propulsion of Light-Driven TiO<sub>2</sub>-Au Janus Micromotors

Yefei Wu<sup>1</sup>, Renfeng Dong<sup>2,\*</sup>, Qilu Zhang<sup>1</sup>, Biye Ren<sup>1,\*</sup>

<sup>1</sup> School of Materials Science and Engineering, South China University of Technology, Guangzhou 510640, People's Republic of China

<sup>2</sup> School of Chemistry and Environment, South China Normal University, Guangzhou 510006, People's Republic of China

\*Corresponding authors. E-mail: [dongrenfeng@126.com](mailto:dongrenfeng@126.com), [mbyren@scut.edu.cn](mailto:mbyren@scut.edu.cn)

Tel.: +86-20-87112708

## Videos

**Video S1** The motion of TiO<sub>2</sub>-Au Janus micromotors in 10<sup>-5</sup> g L<sup>-1</sup> Methyl Blue (MB), 10<sup>-4</sup> g L<sup>-1</sup> Cresol Red (CR), 10<sup>-4</sup> g L<sup>-1</sup> Methyl Orange (MO) aqueous solutions and pure water, respectively

**Video S2** The moving direction of TiO<sub>2</sub>-Au Janus micromotors under UV in MB aqueous solution

**Video S3** The motion of TiO<sub>2</sub>-Au Janus micromotors in different concentration of MB aqueous solution

**Video S4** The motion of TiO<sub>2</sub>-Au Janus micromotors in different concentration of CR aqueous solution

**Video S5** The motion of TiO<sub>2</sub>-Au Janus micromotors in different concentration of MO aqueous solution

**Video S6** Directional control of Au-Ni- TiO<sub>2</sub> Janus micromotors in MB aqueous solution

**Video S7** The motion of Au-Ni- TiO<sub>2</sub> Janus micromotors in MB aqueous solution

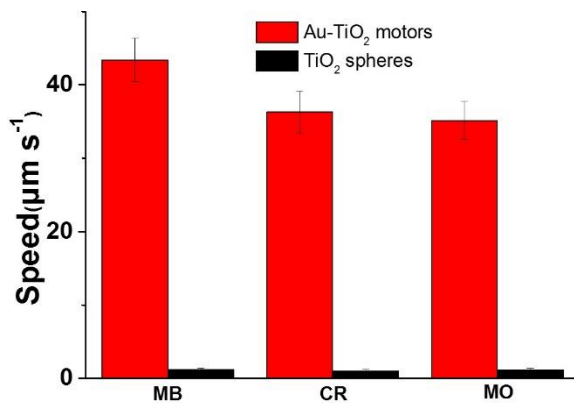

**Fig. S1** The motion speeds of Au-TiO<sub>2</sub> motors (red) and pure TiO<sub>2</sub> spheres (black) in 10<sup>-5</sup> g L<sup>-1</sup> Methyl Blue (MB), 10<sup>-4</sup> g L<sup>-1</sup> Cresol Red (CR), 10<sup>-4</sup> g L<sup>-1</sup> Methyl Orange (MO), respectively.

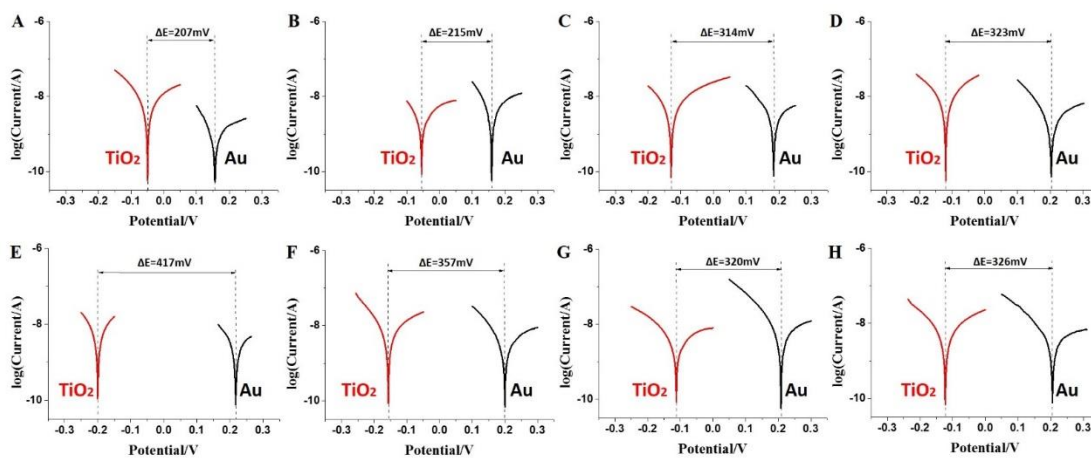

**Fig. S2** Tafel plots of Au (black lines) and TiO<sub>2</sub> (red lines) under UV light in (A)-(H) 10<sup>-1</sup>~10<sup>-8</sup> g L<sup>-1</sup> MB aqueous solutions, respectively

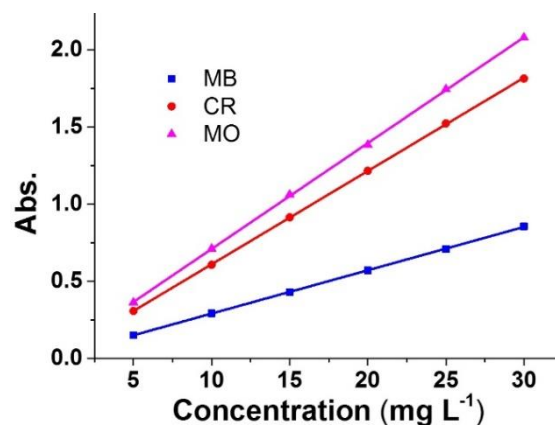

**Fig. S3** Absorption–concentration standard curve of MB, CR and MO in aqueous solutions

The absorption intensity  $A$  of MB, CR, and MO in aqueous solutions were proportional to their concentrations  $C$ . The working curves were obtained by linearly fitting the data of  $A$  and  $C$ . The obtained linear equations are below:

$$A (MB) = 0.0281C + 0.0095 \quad (r^2 = 0.9999) \quad (1)$$

$$A (CR) = 0.0605C + 0.0049 \quad (r^2 = 0.9999) \quad (2)$$

$$A (MO) = 0.0687C + 0.0227 \quad (r^2 = 0.9998) \quad (3)$$
